# Supplementary material
Source: Springer Nature journal article supplement (https://www.springermedizin.de/resource/supplementary/13063_2012_1105_MOESM1_ESM.pdf/9619390)
Supplement: MOESM1 [file 9619390]

# SPECTRUM OF SYMPATHETIC HYPERACTIVITY

Severe TBI

**TIME**

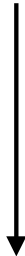

Catecholamine Excess

Abnormal Heart Rate Variability

Agitation and Sympathetic Storms

Discharge

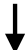

Poor Neuropsychological Outcomes
